# Supplementary material for: Exchange-biased hybrid γ-Fe2O3/NiO core–shell nanostructures: three-step synthesis, microstructure, and magnetic properties
Source: Royal Society of Chemistry journal article supplement (doi:10.1039/c9cp01265f), 2019-01-01
Supplement: c9cp01265f1.pdf [file c9cp01265f1.pdf]

## Exchange-Biased Hybrid $\gamma$ -Fe<sub>2</sub>O<sub>3</sub>/NiO Core-Shell Nanostructures: Three-Step Synthesis, Microstructure, and Magnetic Properties

Xue-Min He,<sup>a,b</sup> Chuang-Wei Zhang,<sup>a</sup> Fang-Fang Guo,<sup>c</sup> Shi-Ming Yan,<sup>d</sup> Yong-Tao Li,<sup>\*a</sup> Li-Qing Liu,<sup>a</sup>  
Hong-Guang Zhang,<sup>a</sup> You-Wei Du,<sup>b</sup> and Wei Zhong<sup>\*b</sup>

---

<sup>a</sup>New Energy Technology Engineering Laboratory of Jiangsu Province, Research Center of Information Physics and School of Science, Nanjing University of Posts and Telecommunications, Nanjing 210023, P. R. China.

<sup>b</sup>National Laboratory of Solid State Microstructures, Nanjing University, Nanjing 210093, P. R. China.

<sup>c</sup>Zernike Institute for Advanced Materials, Faculty of Science and Engineering, University of Groningen, Groningen 9747 AG, the Netherlands.

<sup>d</sup>College of Science, Henan University of Technology, Zhengzhou 450001, P. R. China.

**Figure S1.** XPS spectra of Fe 2p region for (a) Fe<sub>3</sub>O<sub>4</sub>, (b) Fe<sub>3</sub>O<sub>4</sub>/Ni(OH)<sub>2</sub>, (c)  $\gamma$ -Fe<sub>2</sub>O<sub>3</sub>/NiO-300°C, (d)  $\gamma$ -Fe<sub>2</sub>O<sub>3</sub>/NiO-350°C and (e)  $\gamma$ -Fe<sub>2</sub>O<sub>3</sub>/NiO-400°C samples.

**Figure S2.** XPS spectra of Ni 2p region for (a) Fe<sub>3</sub>O<sub>4</sub>, (b) Fe<sub>3</sub>O<sub>4</sub>/Ni(OH)<sub>2</sub>, (c)  $\gamma$ -Fe<sub>2</sub>O<sub>3</sub>/NiO-300°C, (d)  $\gamma$ -Fe<sub>2</sub>O<sub>3</sub>/NiO-350°C and (e)  $\gamma$ -Fe<sub>2</sub>O<sub>3</sub>/NiO-400°C samples.

**Figure S3.** Raman spectra of (a) Fe<sub>3</sub>O<sub>4</sub> and (b) Fe<sub>3</sub>O<sub>4</sub>/Ni(OH)<sub>2</sub> samples.

**Figure S4.** RT (300 K) hysteresis loop of Fe<sub>3</sub>O<sub>4</sub> sample. Inset shows the detail of the same loop around the origin.

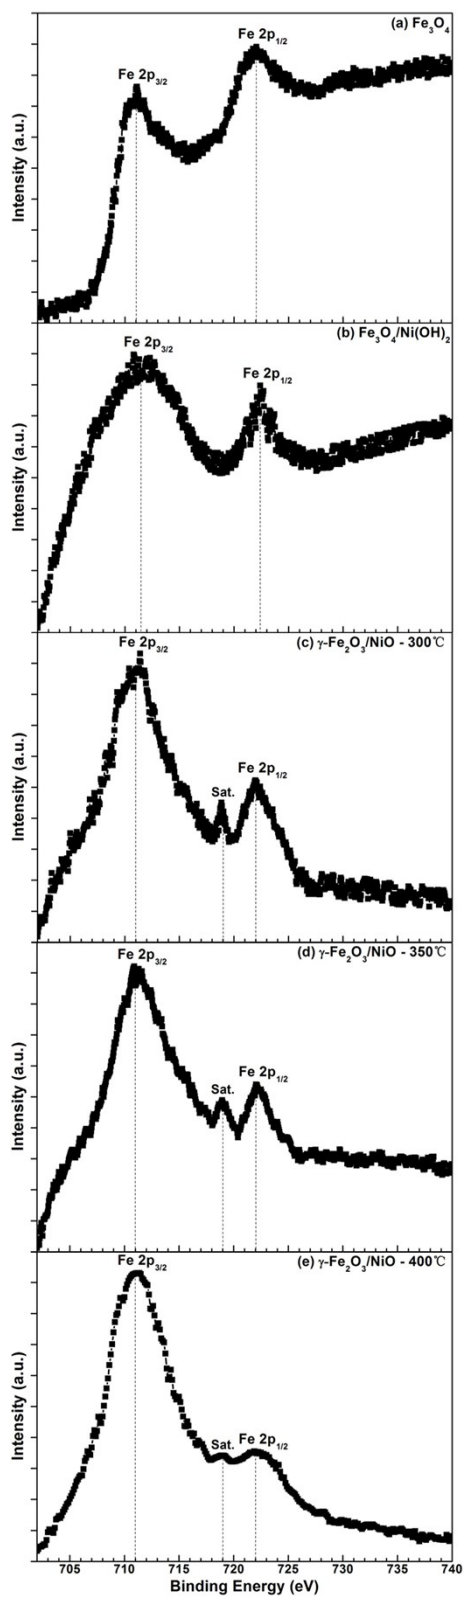

**Figure S1.** XPS spectra of Fe 2p region for (a)  $\text{Fe}_3\text{O}_4$ , (b)  $\text{Fe}_3\text{O}_4/\text{Ni}(\text{OH})_2$ , (c)  $\gamma\text{-Fe}_2\text{O}_3/\text{NiO}$ - $300^\circ\text{C}$ , (d)  $\gamma\text{-Fe}_2\text{O}_3/\text{NiO}$ - $350^\circ\text{C}$  and (e)  $\gamma\text{-Fe}_2\text{O}_3/\text{NiO}$ - $400^\circ\text{C}$  samples.

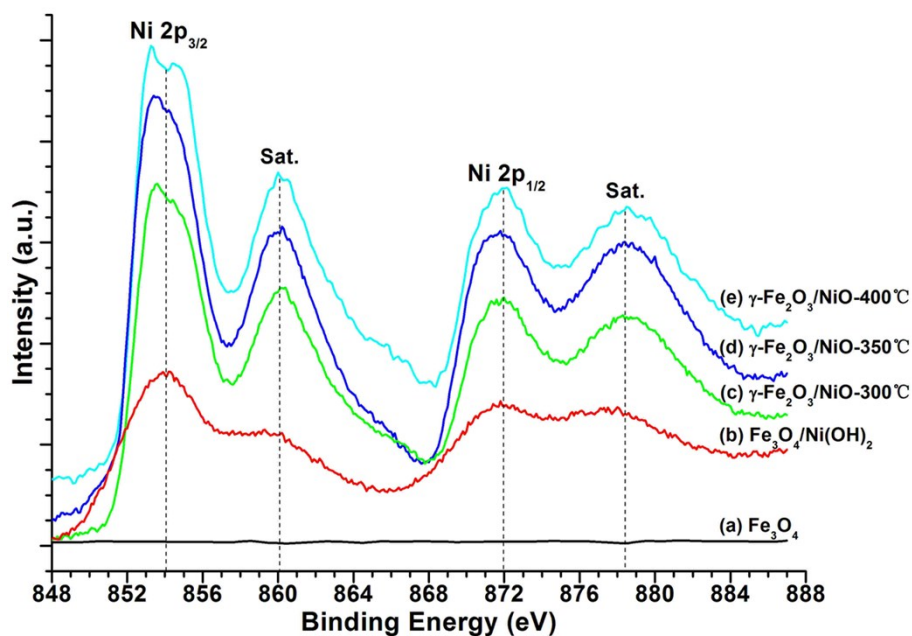

**Figure S2.** XPS spectra of Ni 2p region for (a)  $\text{Fe}_3\text{O}_4$ , (b)  $\text{Fe}_3\text{O}_4/\text{Ni}(\text{OH})_2$ , (c)  $\gamma\text{-Fe}_2\text{O}_3/\text{NiO}$ -300°C, (d)  $\gamma\text{-Fe}_2\text{O}_3/\text{NiO}$ -350°C and (e)  $\gamma\text{-Fe}_2\text{O}_3/\text{NiO}$ -400°C samples.

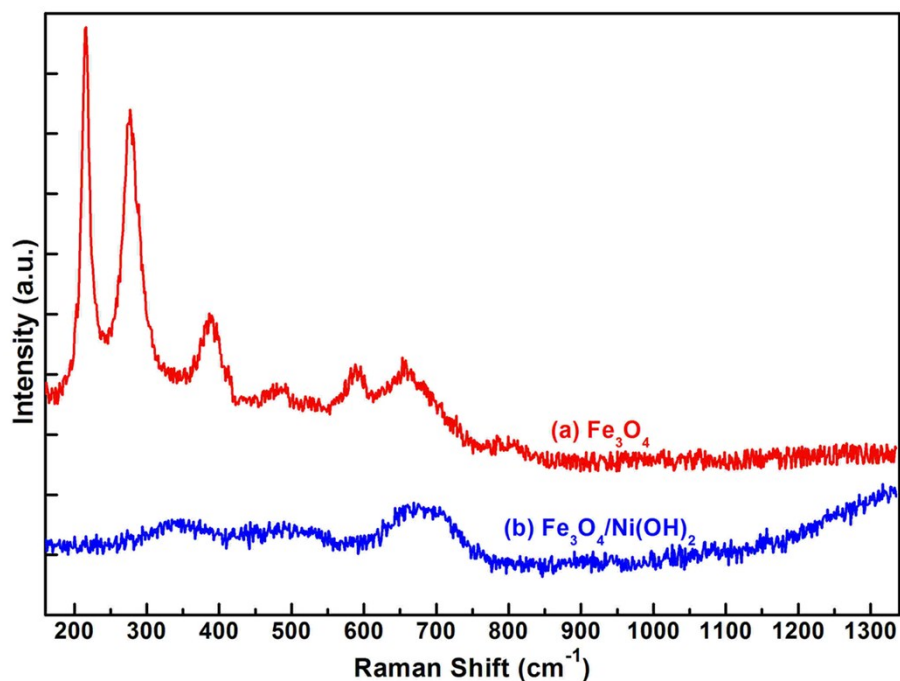

**Figure S3.** Raman spectra of (a)  $\text{Fe}_3\text{O}_4$  and (b)  $\text{Fe}_3\text{O}_4/\text{Ni}(\text{OH})_2$  samples.

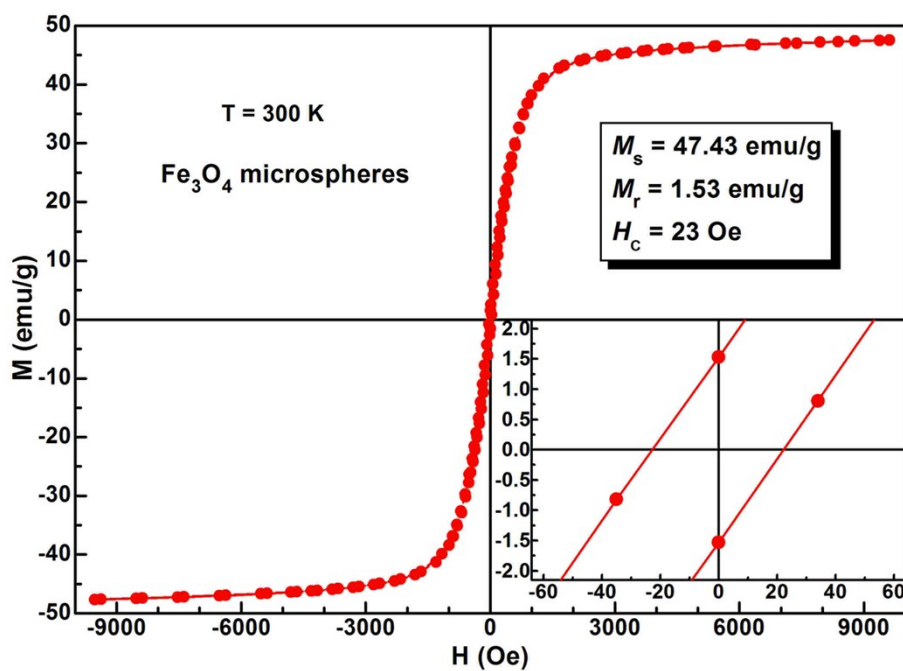

**Figure S4.** RT (300 K) hysteresis loop of Fe<sub>3</sub>O<sub>4</sub> sample. Inset shows the detail of the same loop around the origin.
